# Supplementary material
Source: Springer Nature journal article supplement (https://www.springermedizin.de/resource/supplementary/12960_2004_31_MOESM1_ESM.pdf/9570268)

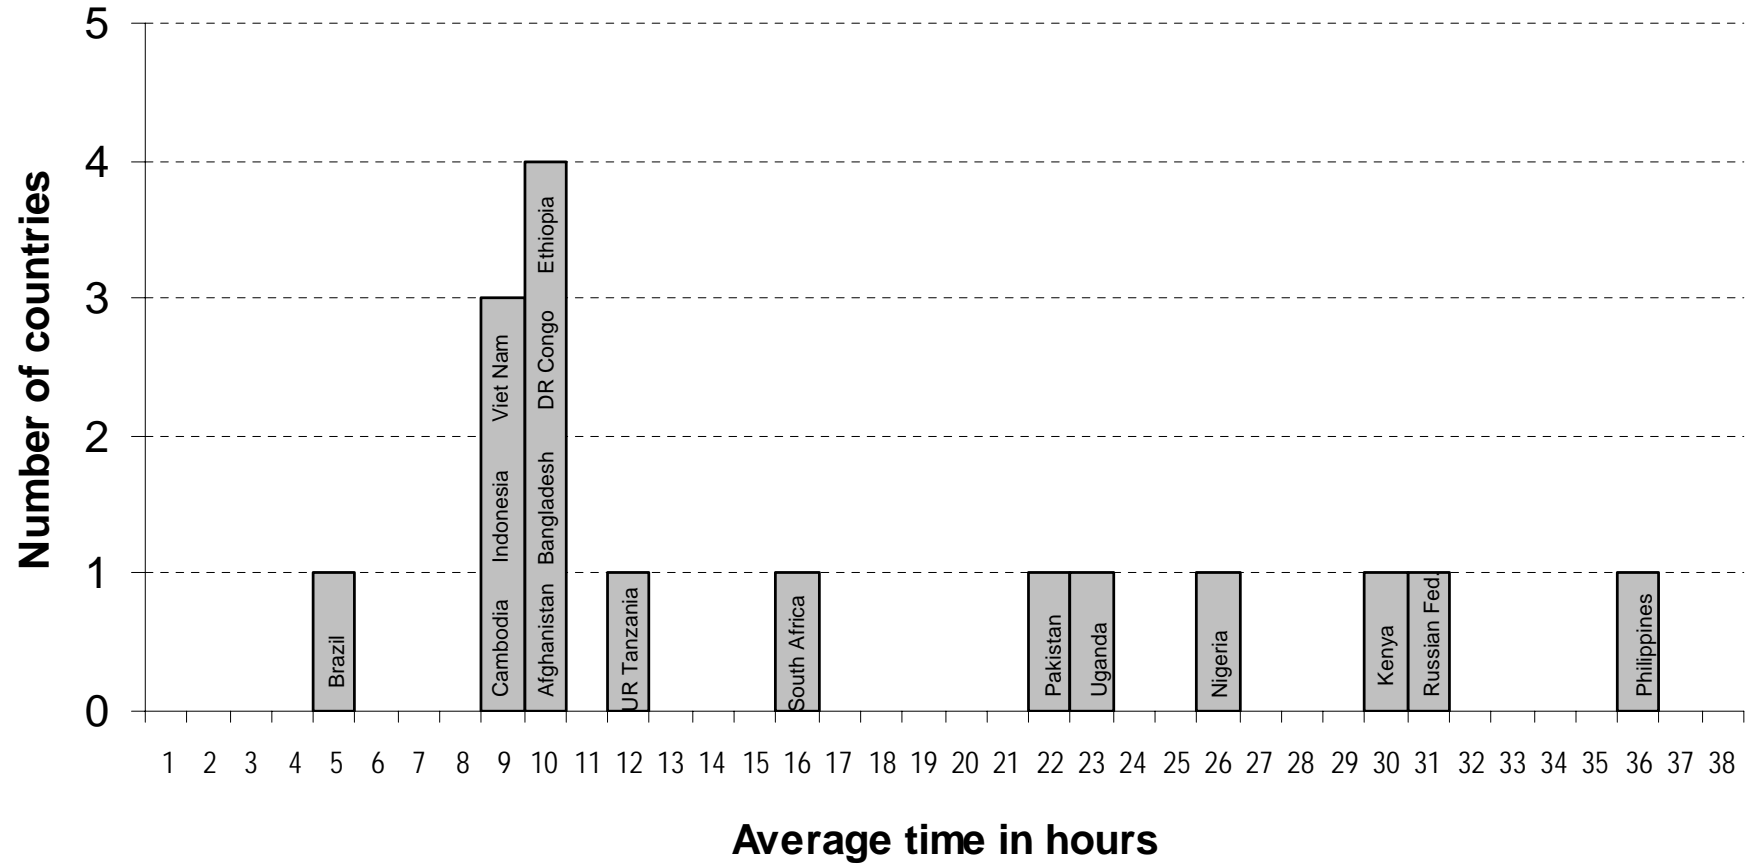

Supplement: MOESM1 [file 9570268]
